# Supplementary material
Source: ML conference proceedings conference paper supplement (https://proceedings.neurips.cc/paper_files/paper/2021/hash/f6c2a0c4b566bc99d596e58638e342b0-Abstract.html)
Supplement: Supplementary file [file f6c2a0c4b566bc99d596e58638e342b0-Supplemental.pdf]

---

# Supplementary Materials for SLOE: A Faster Method for Statistical Inference in High-Dimensional Logistic Regression

---

**Anonymous Author(s)**

Affiliation

Address

email

# 1 A Bootstrap Confidence Intervals

2 Here, we provide additional information about the confidence intervals presented in the main text in  
 3 Figure 4a, and additionally include bootstrap CIs. We used the nonparametric multiplier bootstrap  
 4 [Praestgaard, 1990], where in each bootstrap sample, the MLE is refit with each example weighted  
 5 by an iid Poisson distribution with rate parameter  $\lambda = 1$ . This very closely approximates the  
 6 nonparametric bootstrap with sampling with replacement. For each test prediction, the  $1 - \delta$  CIs are  
 7 calculated using the  $\delta/2$  and  $1 - \delta/2$  quantiles of the bootstrap estimates, known as the percentile  
 8 bootstrap [Efron and Tibshirani, 1993].

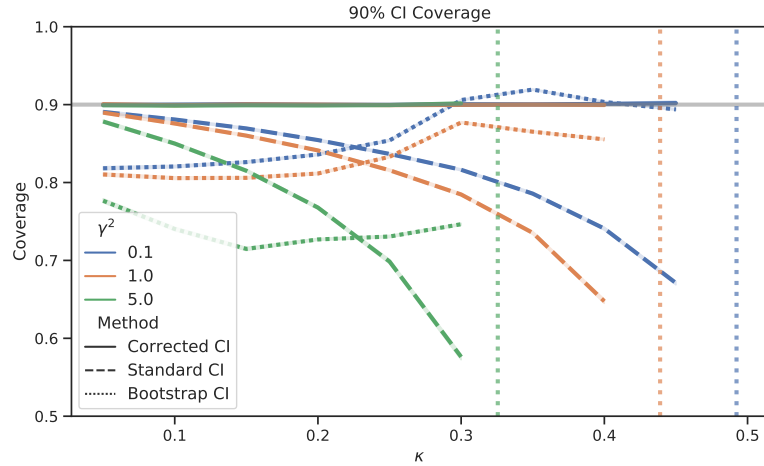

9

**Figure 1.** Same setting as main Figure 4a, including bootstrapped CIs. Notice that the bootstrap CIs do not have proper coverage.

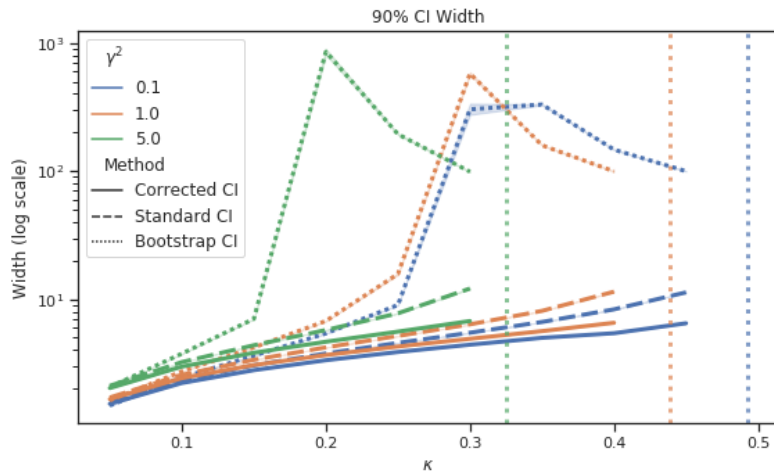

10

**Figure 2.** Same setting as main Figure 4a, but compares the width of the confidence intervals. Notice the large bootstrap CIs, especially when they approach or exceed nominal coverage.

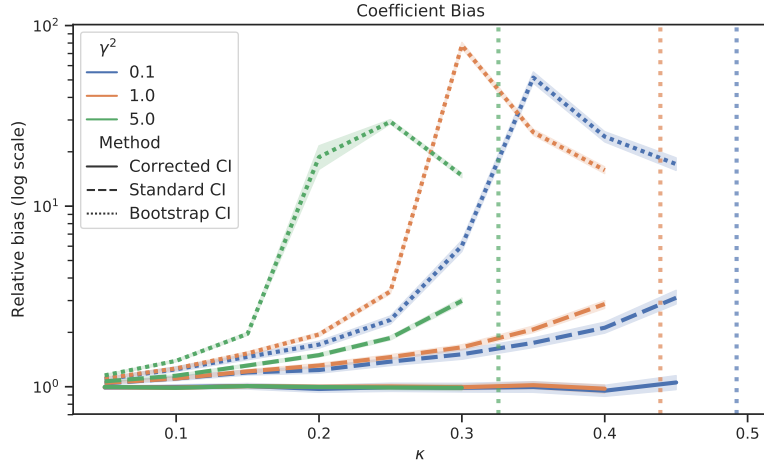

11

**Figure 3.** Same setting as main Figure 4a, but compares the magnitude of the logits of the predictions relative to the magnitude of the true logit, for any test example with  $|x^\top \beta| > 0.01$ . For the bootstrap, this is calculated from the median estimate over bootstrap samples, throwing out any where the data were separable and so the estimate is at  $\pm\infty$ .

## 12 B Proofs

13 Throughout the proofs, we will use  $C > 0$  as a generic constant that could always be made larger  
 14 without invalidating a statement, and  $c > 0$  a generic constant that could always be made smaller  
 15 without invalidating a statement. This way, we can avoid reducing the readability due to onerous  
 16 constant accounting.

17 **Proof of Theorem 1** First, we show that without loss of generality, we can consider the case where  
 18  $\Sigma = I_p$ , the  $p \times p$ -dimensional identity matrix. To see that this is sufficient, we apply Proposition 2.1  
 19 of Zhao et al. [2020], which states the following.

20 **Proposition 1** (Proposition 2.1, Zhao et al. [2020]). Fix any matrix  $L$  obeying  $\Sigma = LL^\top$ , and  
 21 consider the vectors

$$\hat{\theta} = L^\top \hat{\beta}, \text{ and } \theta = L^\top \beta.$$

22 Then,  $\hat{\theta}$  is the MLE in a logistic model with regression coefficient  $\theta$  and covariates drawn i.i.d. from  
 23  $N(0, I_p)$ .

24 With this in mind, we can prove everything in this rotated setting, and as long as  $L^\top$  is full rank,  
 25 the results (up to appropriate scaling) will hold for  $\hat{\beta}$ , as well. Choosing  $L^\top$  to be a Cholesky  
 26 decomposition, it will satisfy  $LL^\top = \Sigma$ , and will be full rank with a bounded operator norm for  $L$   
 27 and its inverse  $L^{-1}$ , because of the assumption that the condition number of  $\Sigma$  is bounded.

28 Now, we prove the result under the assumption that  $\Sigma = I_p$  in three steps. The first is to show that  
 29  $\|\hat{\beta}\|_2^2 \xrightarrow{P} \eta$ . The second is to show that the leave-one-out estimators are close enough in norm to  $\hat{\beta}$   
 30 such that

$$\frac{1}{n} \sum_{i=1}^n \|\hat{\beta}_{-i}\|_2^2 - \|\hat{\beta}\|_2^2 \xrightarrow{P} 0.$$

31 The third is to show that the estimator  $\hat{\eta}_{\text{LOO}}^2$ , which incorporates an empirical estimate of  $\Sigma$ , concen-  
 32 trates around  $\bar{\eta}^2 = \frac{1}{n} \sum_{i=1}^n \|\hat{\beta}_{-i}\|_2^2$ .

33 The first step is a direct application of Theorem 2 of Sur and Candès [2019], which we restate here  
 34 using our problem scaling.

35 **Theorem 2** (Theorem 2, Sur and Candès [2019]). Assume the dimensionality and signal strength  
 36 parameters  $\kappa$  and  $\gamma$  are such that  $\gamma < g_{\text{MLE}}(\kappa)$  (the region where the MLE exists asymptotically and  
 37 is shown in Sur and Candès [2019, Fig. 6]). Assume the logistic model described where the empirical  
 38 distribution of  $\{\sqrt{n}\beta_j\}$  converges weakly to a distribution  $\Pi$  with finite second moment. Suppose  
 39 further that the second moment converges in the sense that as  $n \rightarrow \infty$ ,  $\text{Ave}_j(n\beta_j^2) \rightarrow E[\beta^2]$ ,  $\beta \sim \Pi$ .

40 Then for any pseudo-Lipschitz function  $\psi$  of order 2, the marginal distribution of the MLE coordinates  
 41 obeys

$$\frac{1}{p} \sum_{j=1}^p \psi(\sqrt{n}(\hat{\beta}_j - \alpha_* \beta_j), \beta_j) \xrightarrow{a.s.} \mathbb{E}[\psi(\sigma_* Z, \beta)], \quad Z \sim \mathbf{N}(0, 1),$$

42 where  $\beta \sim \Pi$ , independent of  $Z$ .

43 The first step follows from this theorem using  $\psi(t, u) = (t + \alpha_* u)^2$ , because  $\gamma^2 = \text{Var}(\beta^\top X) =$   
 44  $\|\beta\|_2^2 = \mathbb{E}_\Pi[\beta^2]$ .

45 The second step involves showing that the difference in norms between  $\hat{\beta}$  and  $\hat{\beta}_{-i}$  is small with high  
 46 probability. To do so, we use the following lemma. In this lemma, and throughout the proofs, we will  
 47 use sequences  $K_n$  and  $H_n$ , satisfying the following conditions: for any  $c_H, c_K, \epsilon > 0$ ,

$$K_n = o(n^\epsilon), \quad H_n = o(n^\epsilon), \quad n^8 \exp(-c_H H_n^2) = o(1), \quad \text{and} \quad n^7 \exp(-c_K K_n^2) = o(1). \quad (\text{B.1})$$

48 Taking  $H_n = K_n = \log n$ , for example, would satisfy these conditions.

49 **Lemma 1.** *Let  $\hat{\beta}$  be the MLE and  $\hat{\beta}_{-i}$  be the MLE excluding the  $i$ -th example. Let  $K_n$  and  $H_n$  be  
 50 sequences satisfying (B.1). Then, there exists universal constants  $C, c > 0$  such that*

$$P\left(\left\|\hat{\beta}_{-i} - \hat{\beta}\right\| > C\left(C\frac{K_n}{\sqrt{n}} + \frac{K_n^2 H_n}{n}\right)\right) \leq \exp(-\Omega(n)) + C \exp(-cK_n^2) \\ + Cn \exp(-cH_n^2) + C \exp(-cn(1 + o(1))).$$

51 A similar bound holds for  $\|\hat{\beta}_{-i} - \hat{\beta}_{-ik}\|$ , where  $\hat{\beta}_{-ik}$  is the MLE with the  $i$ -th and  $k$ -th example  
 52 excluded.

53 See Section C for proof. Taking a union bound over the probabilities bounded in Lemma 1 for each  
 54  $i$  gives that the event  $G = \left\{\sup_i \|\hat{\beta}_{-i} - \hat{\beta}\| \leq C_1 \left(\frac{K_n}{\sqrt{n}} + \frac{K_n^2 H_n}{\sqrt{n}}\right)\right\}$  is bounded with probability  
 55  $1 - o(1)$  using the conditions (B.1). Therefore, conditional on  $G$ , we can write

$$\left|\frac{1}{n} \sum_{i=1}^n \|\hat{\beta}_{-i}\|_2^2 - \|\hat{\beta}\|_2^2\right| \leq \frac{1}{n} \sum_{i=1}^n \frac{C_1^2 K_n^4 H_n^2}{n} = \frac{C_1^2 K_n^4 H_n^2}{n} \rightarrow 0,$$

56 with probability converging to 1.

57 Our strategy for the third step is to show that  $\mathbb{E}[\hat{\eta}^2 - \bar{\eta}^2] = 0$ , and then apply Chebyshev's inequality  
 58 and bound the variance. The challenge is that the terms in  $\hat{\eta}_{\text{LOO}}^2$  are not independent, and therefore,  
 59 we will need to show that the covariances are asymptotically negligible. To do so, we will employ a  
 60 leave-two-out argument, inspired by the proof techniques of El Karoui [2018] and Sur and Candès  
 61 [2019].

62 First, write  $\hat{\eta}_{\text{LOO}}^2 - \bar{\eta}^2$  as

$$\frac{1}{n} \sum_{i=1}^n \hat{\beta}_{-i}^\top (X_i X_i^\top - I) \hat{\beta}_{-i}.$$

63 Using that  $\hat{\beta}_{-i}$  is independent of  $X_i$ , we immediately can conclude that  $\mathbb{E}[\hat{\eta}^2 - \bar{\eta}^2] = 0$ .

64 Next, we will use Chebyshev's inequality to bound the probability using the variance. To show that  
 65 the variance goes to zero, we will need to show that, for  $i \neq k$ , the covariance between terms

$$\hat{\beta}_{-i}^\top (X_i X_i^\top - I) \hat{\beta}_{-i} \quad \text{and} \quad \hat{\beta}_{-k}^\top (X_k X_k^\top - I) \hat{\beta}_{-k}$$

66 converges to zero. The challenge in doing so is that the MLE in one term is dependent on the covariate  
 67  $X$  in the other term. We solve this challenge by showing the estimated coefficients  $\hat{\beta}_{-i}$  and  $\hat{\beta}_{-k}$  are  
 68 close enough (for our purposes) to  $\hat{\beta}_{-ik}$ , the MLE with both the  $i$ -th and  $k$ -th predictor excluded.  
 69 Consider the following sequence of events,

$$E_n = \left\{ \sup_i \sup_{k \neq i} |X_i^\top (\hat{\beta}_{-ik} - \hat{\beta}_{-i})| \leq \frac{CK_n^2 H_n}{\sqrt{n}}, \sup_i |X_i^\top \hat{\beta}_{-i}| \leq C \right\}. \quad (\text{B.2})$$

70 The following lemma show that this sequence of events has probability approaching 1.

71 **Lemma 2.** Let  $\widehat{\beta}_{-i}$  be the MLE with the  $i$ -th example held out, and  $\widehat{\beta}_{-ij}$  be the MLE with the  $i$ -th  
72 and  $j$ -th examples held out. Then, there exists universal constants  $C, c > 0$  such that

$$P \left( \sup_i \sup_{k \neq i} |X_i^\top (\widehat{\beta}_{-ik} - \widehat{\beta}_{-i})| \leq \frac{CK_n^2 H_n}{\sqrt{n}} \right) \geq 1 - Cn^2 \exp(-cH_n^2) \\ - Cn \exp(-cK_n^2) - Cn \exp(-cn(1 + o(1))),$$

73 and

$$P \left( \sup_i |X_i^\top \widehat{\beta}_{-i}| \leq C \right) \geq 1 - Cn^2 \exp(-cH_n^2) \\ - Cn \exp(-cK_n^2) - Cn \exp(-cn(1 + o(1))) - Cn \exp(-\Omega(n)),$$

74 As before, the proof of this lemma is in Section C.

75 Additionally, we will need to control the norm of the difference between the leave-one-out and  
76 leave-two-out estimators. Let

$$B_n = \left\{ \sup_i \|\widehat{\beta}_{-i}\|_2 \leq C, \sup_i \sup_{k \neq i} \|\widehat{\beta}_{-ik} - \widehat{\beta}_{-i}\|_2 \leq \frac{C(K_n + K_n^2 H_n)}{\sqrt{n}} \right\}.$$

77 Writing this as the intersection of the events  $B_{ik} = \{\|\widehat{\beta}_{-i}\|_2 \leq C, \|\widehat{\beta}_{-ik} - \widehat{\beta}_{-i}\|_2 \leq \frac{C(K_n + K_n^2 H_n)}{\sqrt{n}}\}$ ,  
78 a union bound over the complements  $B_n^C = \bigcup_{i \neq j} B_{ij}^C$ , along with the control on the probability  
79  $P(B_{ij}^C)$  implied by Sur et al. [2019, Theorem 4] and Lemma 1, respectively, shows that this sequence  
80 of event  $(B_n)_{n=1}^\infty$  has probability approaching 1.

81 Now, we proceed with bounding the probability that  $\widehat{\eta}$  is far from  $\bar{\eta}$ . Let  $\epsilon > 0$ .

$$P(|\widehat{\eta}_{\text{LOO}}^2 - \bar{\eta}^2| > \epsilon) \leq P(|\widehat{\eta}_{\text{LOO}}^2 - \bar{\eta}^2| > \epsilon \mid B_n \cap E_n) + P(E_n^C \cup B_n^C).$$

82 Lemma 2 shows that  $\lim_{n \rightarrow \infty} P(E_n^C) = 0$ . Above, we showed that  $\lim_{n \rightarrow \infty} P(B_n^C) = 0$ , and so  
83  $\lim_{n \rightarrow \infty} P(E_n^C \cup B_n^C) = 0$ . Therefore, what remains is to control  $P(|\widehat{\eta}_{\text{LOO}}^2 - \bar{\eta}^2| > \epsilon \mid B_n \cap E_n)$ .

84 For notational convenience, denote

$$\widetilde{\mathbb{P}}(\cdot) := P(\cdot \mid B_n \cap E_n), \\ \widetilde{\mathbb{E}}[\cdot] := E[\cdot \mid B_n \cap E_n], \text{ and} \\ \widetilde{\text{Var}}(\cdot) := \text{Var}(\cdot \mid B_n \cap E_n).$$

85 Applying Chebyshev's inequality,

$$\widetilde{\mathbb{P}}(|\widehat{\eta}_{\text{LOO}}^2 - \bar{\eta}^2| > \epsilon) \leq \frac{\widetilde{\text{Var}}\left(\frac{1}{n} \sum_{i=1}^n \widehat{\beta}_{-i}^\top (X_i X_i^\top - I) \widehat{\beta}_{-i}\right)}{\epsilon^2}.$$

86 Showing that  $\widetilde{\text{Var}}\left(\frac{1}{n} \sum_{i=1}^n \widehat{\beta}_{-i}^\top (X_i X_i^\top - I) \widehat{\beta}_{-i}\right) \rightarrow 0$  completes the proof. To do so, expand the  
87 sum as

$$\widetilde{\text{Var}}\left(\frac{1}{n} \sum_{i=1}^n \widehat{\beta}_{-i}^\top (X_i X_i^\top - I) \widehat{\beta}_{-i}\right) \\ = \frac{1}{n^2} \left( \sum_{i=1}^n \widetilde{\text{Var}}(\widehat{\beta}_{-i}^\top (X_i X_i^\top - I) \widehat{\beta}_{-i}) \right. \\ \left. + \sum_{i \neq k} \widetilde{\mathbb{E}} \left[ \widehat{\beta}_{-i}^\top (X_i X_i^\top - I) \widehat{\beta}_{-i} \widehat{\beta}_{-k}^\top (X_k X_k^\top - I) \widehat{\beta}_{-k} \right] \right)$$

88 On  $B_n$ ,  $\widehat{\beta}_{-i}$  all have bounded norm. The known normal distribution of the  $X_i$  allows us to conclude  
 89 that the  $n$  variance terms  $\widehat{\text{Var}}(\widehat{\beta}_{-i}^\top (X_i X_i^\top - I) \widehat{\beta}_{-i})$  will be bounded by some fixed constant. What  
 90 remains is to control the  $n(n-1)$  covariance terms.

91 Consider the  $i$ -th and  $k$ -th covariance term,

$$\widetilde{\mathbb{E}} \left[ \widehat{\beta}_{-i}^\top (X_i X_i^\top - I) \widehat{\beta}_{-i} \cdot \widehat{\beta}_{-k}^\top (X_k X_k^\top - I) \widehat{\beta}_{-k} \right].$$

92 The challenge is that  $\widehat{\beta}_{-i}$  is not independent of  $X_k$ , which prevents us from splitting these terms into  
 93 the product of their expectations. With this in mind, we imagine instead that the first quadratic form  
 94 was  $\widehat{\beta}_{-ik}^\top (X_i X_i^\top - I) \widehat{\beta}_{-ik}$ , which would be independent of  $X_k$ , and then study the remainder terms.  
 95 For notational convenience, denote

$$Z_i = X_i X_i^\top - I.$$

96 Writing  $\widehat{\beta}_{-i} = \widehat{\beta}_{-ik} + \widehat{\beta}_{-i} - \widehat{\beta}_{-ik}$ , the above covariance expands as

$$\begin{aligned} & \widetilde{\mathbb{E}} \left[ (\widehat{\beta}_{-ik} + \widehat{\beta}_{-i} - \widehat{\beta}_{-ik})^\top Z_i (\widehat{\beta}_{-ik} + \widehat{\beta}_{-i} - \widehat{\beta}_{-ik}) \widehat{\beta}_{-k}^\top Z_k \widehat{\beta}_{-k} \right] \\ &= \widetilde{\mathbb{E}} \left[ \left( \widehat{\beta}_{-ik}^\top Z_i \widehat{\beta}_{-ik} + 2(\widehat{\beta}_{-i} - \widehat{\beta}_{-ik})^\top Z_i \widehat{\beta}_{-ik} + (\widehat{\beta}_{-i} - \widehat{\beta}_{-ik})^\top Z_i (\widehat{\beta}_{-i} - \widehat{\beta}_{-ik}) \right) \widehat{\beta}_{-k}^\top Z_k \widehat{\beta}_{-k} \right] \\ &= \widetilde{\mathbb{E}} \left[ \widehat{\beta}_{-ik}^\top Z_i \widehat{\beta}_{-ik} \widehat{\beta}_{-k}^\top Z_k \widehat{\beta}_{-k} \right] \\ &+ \widetilde{\mathbb{E}} \left[ \left( 2(\widehat{\beta}_{-i} - \widehat{\beta}_{-ik})^\top Z_i \widehat{\beta}_{-ik} + (\widehat{\beta}_{-i} - \widehat{\beta}_{-ik})^\top Z_i (\widehat{\beta}_{-i} - \widehat{\beta}_{-ik}) \right) \widehat{\beta}_{-k}^\top Z_k \widehat{\beta}_{-k} \right] \end{aligned} \quad (\text{B.3})$$

97 Because  $\mathbb{E}[Z_k \mid \{(X_i, Y_i)\}_{i \neq k}] = 0$ , we expect that the first term of (B.3) should be nearly 0, as  
 98 well, except that we have conditioned on  $B_n \cap E_n$ , which might change the distribution of  $Z_k$ . The  
 99 following lemma controls the difference between  $\mathbb{E}[Z_k \mid \{(X_i, Y_i)\}_{i \neq k}]$  and  $\widetilde{\mathbb{E}}[Z_k \mid \{(X_i, Y_i)\}_{i \neq k}]$ ,  
 100 showing that it vanishes asymptotically.

101 **Lemma 3.** *Let  $E_n$  be defined as in (B.2) and  $B_n$  as in (B). Under the conditions of Theorem 1,*

$$\left| \widetilde{\mathbb{E}} \left[ \widehat{\beta}_{-ik}^\top Z_i \widehat{\beta}_{-ik} \widehat{\beta}_{-k}^\top Z_k \widehat{\beta}_{-k} \right] \right| = o\left(\frac{1}{n}\right). \quad (\text{B.4})$$

102

103 We bound the remaining terms by using the properties of the events  $B_n$  and  $E_n$ , on which we've  
 104 conditioned.

$$\begin{aligned} & \left| \left( 2(\widehat{\beta}_{-i} - \widehat{\beta}_{-ik})^\top Z_i \widehat{\beta}_{-ik} + (\widehat{\beta}_{-i} - \widehat{\beta}_{-ik})^\top Z_i (\widehat{\beta}_{-i} - \widehat{\beta}_{-ik}) \right) \widehat{\beta}_{-k}^\top Z_k \widehat{\beta}_{-k} \right| \\ &= \left| 2(\widehat{\beta}_{-i} - \widehat{\beta}_{-ik})^\top Z_i \widehat{\beta}_{-ik} + (\widehat{\beta}_{-i} - \widehat{\beta}_{-ik})^\top Z_i (\widehat{\beta}_{-i} - \widehat{\beta}_{-ik}) \right| \cdot |\widehat{\beta}_{-k}^\top Z_k \widehat{\beta}_{-k}| \end{aligned}$$

105 The second term is bounded on the event  $B_n$ , using the bounded norm of  $\widehat{\beta}_{-k}$  and the fact that  $X_i$  is  
 106 normally distributed with variance  $I_p$ . Conditional on the set  $E_n \cap B_n$ , the first term is bounded by  
 107  $\sqrt{\frac{C^3 K_n^4 H_n^2}{n} + \frac{C K_n^4 H_n^2}{n}}$ , for some universal constant  $C > 0$ .

108 Plugging all of these into the expression for the variance, we see that

$$\widehat{\text{Var}} \left( \frac{1}{n} \sum_{i=1}^n \widehat{\beta}_{-i}^\top (X_i X_i^\top - I) \widehat{\beta}_{-i} \right) \lesssim \frac{K_n^2 H_n}{\sqrt{n}} + \frac{1}{n},$$

109 which shows that

$$\lim_{n \rightarrow \infty} P(|\widehat{\eta}^2 - \bar{\eta}^2| > \epsilon) = 0,$$

110 concluding the proof of Theorem 1. □

111

## 112 B.1 Approximation Error of Taylor Expansion

113 **Proof of Proposition 2** First, we derive the remainder between  $\widehat{\beta}_{-i}$  and  $\widehat{\beta} + H_{-i}^{-1}X_i(Y_i -$   
 114  $g(\widehat{\beta}^\top X_i))$ . Then, we show that these remainder terms in the difference between  $\widehat{\eta}_{\text{SLOE}}$  and  $\widehat{\eta}_{\text{LOO}}$   
 115 vanish.

116 Starting from Eq. (3.5), we apply a Taylor expansion with the remainder given by the Mean Value  
 117 Theorem,

$$X_i(Y_i - g(\widehat{\beta}^\top X_i)) + \sum_{j \in \mathcal{I}_{-i}} X_j g'(\widehat{\beta}^\top X_j) X_j^\top (\widehat{\beta}_{-i} - \widehat{\beta}) + \sum_{j \in \mathcal{I}_{-i}} X_j \frac{1}{2} g''(\beta_{-i}^\circ \top X_j) (X_j^\top (\widehat{\beta}_{-i} - \widehat{\beta}))^2 = 0,$$

118 for  $\beta_{-i}^\circ = t\widehat{\beta} + (1-t)\widehat{\beta}_{-i}$  for some  $t \in [0, 1]$ . Let  $R_n = \sum_{j \in \mathcal{I}_{-i}} X_j \frac{1}{2} g''(\beta_{-i}^\circ \top X_j) (X_j^\top (\widehat{\beta}_{-i} - \widehat{\beta}))^2$   
 119 be the remainder term that leaves only linear terms. By showing that its norm is growing much more  
 120 slowly than the other terms in the above equality, we show that it is asymptotically negligible. To do  
 121 so, for any  $0 < \varepsilon < 1/2$ , let  $V_n = n^{-\varepsilon} R_n$ . Then, we have

$$X_i(Y_i - g(\widehat{\beta}^\top X_i)) + n^\varepsilon V_n + \sum_{j \in \mathcal{I}_{-i}} X_j g'(\widehat{\beta}^\top X_j) X_j^\top (\widehat{\beta}_{(-i)} - \widehat{\beta}) = 0,$$

122 Lemma 17 from Sur et al. [2019] shows that for  $K_n$  and  $H_n$  satisfying (B.1),  $\sup_{i \neq j} |X_j^\top (\widehat{\beta}_{(-i)} -$   
 123  $\widehat{\beta})| \leq CK_n^2 H_n / \sqrt{n}$  with probability  $1 - \delta_n$  for  $\delta_n = Cn \exp(-cH_n^2) - C \exp(-cK_n^2) -$   
 124  $\exp(-cn(1 + o(1)))$ . Using the condition (B.1) with  $\varepsilon = \varepsilon/3$ , we know that  $n^{-\varepsilon} K_n^2 H_n = o(1)$ .  
 125 Therefore, the above observation along with the fact that  $g''(s) \leq 1$  for all  $s$ , implies that  $V_n \in \mathbb{R}^d$   
 126 satisfies

$$\|L^{-1}V_n\|_2^2 \leq \frac{C^2}{n} \left\| \frac{1}{\sqrt{n}} \sum_{j \in \mathcal{I}_{-i}} L^{-1}X_j \right\|_2^2$$

127 with probability at least  $1 - \delta_n$ , for  $L$  a full rank triangular matrix satisfying  $LL^\top = \Sigma$ . Using  
 128 that  $L^{-1}X_i$  is an isotropic Gaussian, and applying standard concentration bounds for multivariate  
 129 Gaussians, we get that with probability at least  $1 - 2n \exp(-(\sqrt{p} - 1)^2/2)$ ,

$$\frac{C^2}{n} \left\| \frac{1}{\sqrt{n}} \sum_{j \in \mathcal{I}_{-i}} L^{-1}X_j \right\|_2^2 \leq 2C^2\kappa.$$

130 Altogether,  $\|L^{-1}V_n\|_2^2 \leq 2C^2\kappa$  with probability at least  $1 - \delta_n - 2n \exp(-(\sqrt{p} - 1)^2/2)$ .

131 Using this fact about the remainder, we proceed with bounding the difference between  $\widehat{\eta}_{\text{LOO}}^2$  and  
 132  $\widehat{\eta}_{\text{SLOE}}^2$ . For notational convenience, define  $\widetilde{\beta}_{-i} = \widehat{\beta} + H_{-i}^{-1}X_i(Y_i - g(\widehat{\beta}^\top X_i))$ . Then,

$$\left| \frac{1}{n} \sum_{i=1}^n (X_i^\top \widehat{\beta}_{-i})^2 - (X_i^\top \widetilde{\beta}_{-i})^2 \right| \leq \frac{1}{n} \sum_{i=1}^n (X_i^\top n^\varepsilon H_{-i}^{-1}V_n)^2 \leq \frac{1}{n} \sum_{i=1}^n \|X_i\|_2^2 n^{2\varepsilon} \|H_{-i}^{-1}V_n\|_2^2 \quad (\text{B.5})$$

133 Standard results for multivariate Gaussians show that  $\sup_{i=1, \dots, n} \|X_i\|_2^2 < 4p$  with probability  
 134  $1 - o(1)$ . Therefore, what remains is to bound  $\|H_{-i}^{-1}V_n\|_2^2$ .

135 To do so, we take advantage of Lemma 7 from Sur et al. [2019], proved in the setting where  
 136  $X_i \sim \mathcal{N}(0, I_d)$ . Therefore, we start by showing that we can convert our problem into one in this  
 137 setting. Specifically, let  $Z_i = L^{-1}X_i$ , so that  $Z_i \sim \mathcal{N}(0, I_d)$ . Let  $G_{-i} = \frac{1}{n} \sum_{i=1}^n Z_i g'(Z_i^\top L^\top \beta) Z_i$ .  
 138 Noting that  $\|L^\top \beta\|_2^2 = \beta^\top LL^\top \beta = \beta^\top \Sigma \beta = \gamma^2$ , applying Lemma 7 of Sur et al. [2019] gives that  
 139  $P(\lambda_{\min}(G_{-i}) > \lambda_{lb}) \geq 1 - C \exp(-cn)$ , for some  $\lambda_{lb} > 0$ .

140 Noting that the bounded condition number of  $\Sigma$  implies that the operator norm of  $L^{-\top}$  is bounded,  
 141 we have that with probability converging to 1,

$$\|H_{-i}^{-1}V_n\|_2^2 = \left\| \frac{1}{n} L^{-\top} G_{-i}^{-1} L^{-1} V_n \right\|_2^2 \leq \frac{2C^2\kappa}{n^2 \lambda_{lb}^2}.$$

142 All of the above results hold with exponentially high probability, such that we can union bound over  
 143 the  $n$  remainder terms, for each  $i$  and still have the probability converge to 1.

144 Plugging all of these high probability bounds into the RHS of (B.5) gives

$$\frac{1}{n} \sum_{i=1}^n \|X_i\|_2^2 n^{2\varepsilon} \|H_{-i}^{-1} V_n\|_2^2 \leq 4p \frac{2C^2 \kappa n^{2\varepsilon}}{n^2 \lambda_{lb}^2} = \frac{8C^2 \kappa^2 n^{2\varepsilon}}{n \lambda_{lb}^2}$$

145 with probability converging to 1. Similar derivation shows that

$$\left| \left( \frac{1}{n} \sum_{i=1}^n X_i^\top \hat{\beta}_{-i} \right)^2 - \left( \frac{1}{n} \sum_{i=1}^n X_i^\top \tilde{\beta}_{-i} \right)^2 \right| \leq 2\kappa C \frac{n^\varepsilon}{\sqrt{n}},$$

146 also with probability going to 1, and so  $\hat{\eta}_{\text{SLOE}} = \hat{\eta}_{\text{LOO}}^2 + o_P(1)$ . □

147

## 148 C Proofs of Lemmas

149 **Proof of Lemma 1** We use the following result from Lemma 18 from [Sur et al. \[2019\]](#). There,  
 150 they define

$$q_i = \frac{1}{n} X_i^\top H_{-i}^{-1} X_i,$$

$$\hat{b} = \hat{\beta}_{-i} - \frac{1}{n} H_{-i}^{-1} X_i \left( g(\text{prox}_{q_i G}(X_i^\top \hat{\beta}_{-i})) \right),$$

151 and show that

$$P \left( \|\hat{\beta} - \hat{b}\|_2 \leq C \frac{K_n^2 H_n}{n} \right) \geq 1 - Cn \exp(-cH_n^2) - C \exp(-cK_n^2) - \exp(-cn(1 + o(1))).$$

152 Additionally, in the proof (Eq. (165) and (172), respectively), they show that

$$P(\|H_{-i}^{-1} X_i\|_2^2 \leq Cn) \geq 1 - \exp(-\Omega(n)).$$

153 and

$$P \left( g(\text{prox}_{q_i G}(X_i^\top \hat{\beta}_{-i})) \leq CK_n \right) \geq 1 - C \exp(-C_3 K_n^2) - C \exp(-cn).$$

154 Together, these show that

$$P \left( \|\hat{b} - \hat{\beta}_{-i}\|_2 \geq \frac{C^2 K_n}{\sqrt{n}} \right) = P \left( \frac{1}{n} \|H_{-i}^{-1} X_i g(\text{prox}_{q_i G}(X_i^\top \hat{\beta}_{-i}))\|_2 \leq CK_n \frac{C}{\sqrt{n}} \right)$$

$$\geq 1 - \exp(-\Omega(n)) - C \exp(-cK_n^2) - C \exp(-cn).$$

155 With this in mind, observe that

$$\begin{aligned} \|\hat{\beta} - \hat{\beta}_{-i}\|_2 &= \|\hat{\beta} - \hat{b} + \hat{b} - \hat{\beta}_{-i}\|_2 \\ &\leq \|\hat{\beta} - \hat{b}\|_2 + \|\hat{b} - \hat{\beta}_{-i}\|_2 \\ &\leq C_1 \frac{K_n^2 H_n}{n} + \frac{C^2 K_n}{\sqrt{n}} \end{aligned}$$

156 with probability at least

$$1 - \exp(-\Omega(n)) - C \exp(-cK_n^2) - Cn \exp(-cH_n^2) - C \exp(-cn(1 + o(1))),$$

157 for some  $C, c > 0$ , as claimed. □

158



159 **Proof of Lemma 2** To prove the first statement, we will simply take a union bound over the  
 160  $n(n-1)$  events for each pair of  $i, k$  that

$$E_{ik} = \left\{ |X_i^\top (\widehat{\beta}_{-ik} - \widehat{\beta}_{-i})| \geq \frac{CK_n^2 H_n}{\sqrt{n}} \right\}.$$

161 Lemma 11 from the Supplementary Materials of [Sur and Candès \[2019\]](#) essentially shows that  
 162  $P(E_{ik}) = o(1)$ . We reproduce their Lemma 11 here for completeness. In this context, they assume  
 163 that the  $j$ -th predictor is null,  $\beta_j = 0$ .

164 **Lemma 4** (Lemma 11, [Sur and Candès \[2019\]](#)). *For any pair  $(i, k) \in [n]$ , let  $\widehat{\beta}_{-i,-j}, \widehat{\beta}_{-k,-j}$  denote  
 165 the MLEs obtained on dropping the  $i$ -th and  $k$ -th observations respectively, and, in addition, removing  
 166 the  $j$ -th predictor. Further, denote  $\widehat{\beta}_{-ik,-j}$  to be the MLE obtained on dropping both the  $i$ -th,  $k$ -th  
 167 observations and the  $j$ -th predictor. Then the following relation holds*

$$P\left(\max\left\{\left|X_{i,-j}^\top\left(\widehat{\beta}_{-i,-j}-\widehat{\beta}_{-ik,-j}\right)\right|,\left|X_{k,-j}^\top\left(\widehat{\beta}_{-k,-j}-\widehat{\beta}_{-ik,-j}\right)\right|\right\}\lesssim n^{-1/2+o(1)}\right)=1-o(1).$$

168 While they do not precisely track the rates of the lower order terms on the event or it's probability,  
 169 inspecting their proof, which uses a slight modification of Lemma 17 and 18 from [Sur et al. \[2019\]](#),  
 170 shows that the following precise bound holds: Let  $K_n$  and  $H_n$  satisfy the conditions in (B.1). Then,  
 171 there exists universal constants  $C_1, C_2, C_3, C_4, c_2, c_3 > 0$  such that

$$\begin{aligned} P\left(\max\left\{\left|X_{i,-j}^\top\left(\widehat{\beta}_{-i,-j}-\widehat{\beta}_{-ik,-j}\right)\right|,\left|X_{k,-j}^\top\left(\widehat{\beta}_{-k,-j}-\widehat{\beta}_{-ik,-j}\right)\right|\right\}\leq\frac{C_1K_n^2H_n}{\sqrt{n}}\right) \\ \geq 1-C_2n\exp(-c_2H_n^2)-C_3\exp(-c_3K_n^2)-\exp(-C_4n(1+o(1))). \end{aligned}$$

172 A null predictor left out of fitting the MLE has no effect on the problem, so we can ignore the  
 173 dependence on  $j$ , to get  $P(E_{ik}) \leq Cn \exp(-cH_n^2) + C \exp(-cK_n^2) + \exp(-cn(1+o(1)))$ .

174 Taking a union bound over the  $n(n-1)$  events  $E_{ik}$  proves the result of Lemma 2, which will be  $o(1)$   
 175 under the conditions on  $K_n$  and  $H_n$  that  $n^4 \exp(-c_1H_n^2) = o(1)$ , and  $n^3 \exp(-c_2K_n^2) = o(1)$ , for  
 176 any  $c_1, c_2 > 0$  made in condition (B.1).

177 To prove the second statement, note that [Sur et al. \[2019, Theorem 4\]](#) implies that  $\|\widehat{\beta}\|_2 > C$  with  
 178 probability less than  $C \exp(-cn)$ . Lemma 1 shows that  $\widehat{\beta}_i$  is in a  $K_n/\sqrt{n}$ -neighborhood of  $\widehat{\beta}$  with  
 179 high probability. Together, these imply that  $\|\widehat{\beta}_{-i}\|_2 > C$  with probability at most

$$\exp(-\Omega(n)) + C \exp(-cK_n^2) + Cn \exp(-cH_n^2) + C \exp(-cn(1+o(1))).$$

180 Then, using that  $X_i$  is independent of  $\widehat{\beta}_{-i}$ , we have

$$\begin{aligned} P(|X_i^\top \widehat{\beta}_{-i}| > C^2 K_n) &\leq P(|X_i^\top \widehat{\beta}_{-i}| > C^2 \mid \|\widehat{\beta}_{-i}\|_2 \leq C) + P(\|\widehat{\beta}_{-i}\|_2 > C) \\ &= \mathbb{E}\left[P(|X_i^\top \widehat{\beta}_{-i}| > C^2 K_n \mid \widehat{\beta}_{-i}) \mid \|\widehat{\beta}_{-i}\|_2 \leq C\right] + P(\|\widehat{\beta}_{-i}\|_2 > C) \\ &= \mathbb{E}\left[P(|X_i^\top \widehat{\beta}_{-i}| > C^2 K_n \mid \widehat{\beta}_{-i}) \mid \|\widehat{\beta}_{-i}\|_2 \leq C\right] + P(\|\widehat{\beta}_{-i}\|_2 > C) \\ &\leq \mathbb{E}\left[C \exp(-cK_n^2) \mid \|\widehat{\beta}_{-i}\|_2 \leq C\right] + P(\|\widehat{\beta}_{-i}\|_2 > C) \\ &= C \exp(-cK_n^2) + P(\|\widehat{\beta}_{-i}\|_2 > C) \end{aligned}$$

181 where the last inequality follows from the fact that conditional on  $\widehat{\beta}_{-i}$ ,  $X_i^\top \widehat{\beta}_{-i} \sim \mathbf{N}(0, \|\widehat{\beta}_{-i}\|_2^2)$ , and  
 182 uses the standard tail bound of a Gaussian distribution. Taking a union bound over  $i \in \{1, \dots, n\}$   
 183 gives that complement of the statement in the Lemma occurs with probability less than

$$n(C \exp(-cK_n^2) + \exp(-\Omega(n)) + C \exp(-cK_n^2) + Cn \exp(-cH_n^2) + C \exp(-cn(1+o(1)))).$$

184 □

185

186 **Proof of Lemma 3** We know that  $\mathbb{E}[Z_k] = 0$ , however, to control the expectation in (B.4), we  
 187 need to deal with two issues. The first is that we need to ensure that all of the quantities in the

188 expectation are absolutely integrable, so that all expectations are well-defined and finite. Then,  
 189 the second is that the events  $E_n$  and  $B_n$  on which  $\mathbb{E}[\cdot] = \mathbb{E}[\cdot \mid E_n \cap B_n]$  is conditioned are not  
 190 independent of  $Z_k$ , so we must check that conditioning does not change the expectation too much.

191 To address the first issue, we will condition on the event that the leave-one-out MLE  $\widehat{\beta}_{-k}$  and all of  
 192 the leave-two-out MLEs leaving out  $k$ ,  $\{\widehat{\beta}_{-ik}\}_{i \neq k}$ , are bounded:

$$V_k = \{\|\widehat{\beta}_{-k}\|_2 \leq C, \sup_{i \neq k} \|\widehat{\beta}_{-ik}\|_2 \leq C\},$$

193 where  $C$  is chosen so that  $V_k \supset B_n$  (that is,  $B_n$  implies  $V_k$ ) for all  $n, k$ . Notice that  $V_k$  is independent  
 194 of  $Z_k$ , and ensures that all of the quantities in (B.4) are sufficiently bounded or integrable, so that

$$\mathbb{E}[\widehat{\beta}_{-ik}^\top Z_i \widehat{\beta}_{-ik} \widehat{\beta}_{-k}^\top Z_k \widehat{\beta}_{-k} \mid V_k] = 0.$$

195 Now, we relate  $\mathbb{E}[\widehat{\beta}_{-ik}^\top Z_i \widehat{\beta}_{-ik} \widehat{\beta}_{-k}^\top Z_k \widehat{\beta}_{-k}]$  to  $\mathbb{E}[\widehat{\beta}_{-ik}^\top Z_i \widehat{\beta}_{-ik} \widehat{\beta}_{-k}^\top Z_k \widehat{\beta}_{-k} \mid V_k]$  by splitting up the  
 196 latter into parts conditional on  $E_n \cup B_n$  and  $(E_n \cap B_n)^C$ . Indeed,

$$\begin{aligned} \mathbb{E}[\widehat{\beta}_{-ik}^\top Z_i \widehat{\beta}_{-ik} \widehat{\beta}_{-k}^\top Z_k \widehat{\beta}_{-k} \mid V_k] &= \mathbb{E}[\widehat{\beta}_{-ik}^\top Z_i \widehat{\beta}_{-ik} \widehat{\beta}_{-k}^\top Z_k \widehat{\beta}_{-k} \mathbf{1}\{E_n \cap B_n\} \mid V_k] \\ &\quad + \mathbb{E}[\widehat{\beta}_{-ik}^\top Z_i \widehat{\beta}_{-ik} \widehat{\beta}_{-k}^\top Z_k \widehat{\beta}_{-k} \mathbf{1}\{(E_n \cap B_n)^C\} \mid V_k], \end{aligned}$$

197 and recalling that  $V_k \supset (E_n \cap B_n)$ , we know that

$$\mathbb{E}[\widehat{\beta}_{-ik}^\top Z_i \widehat{\beta}_{-ik} \widehat{\beta}_{-k}^\top Z_k \widehat{\beta}_{-k} \mathbf{1}\{E_n \cap B_n\} \mid V_k] = \mathbb{E}[\widehat{\beta}_{-ik}^\top Z_i \widehat{\beta}_{-ik} \widehat{\beta}_{-k}^\top Z_k \widehat{\beta}_{-k} \mid E_n \cap B_n] P(E_n \cap B_n \mid V_k).$$

198 Using that  $\mathbb{E}[\widehat{\beta}_{-ik}^\top Z_i \widehat{\beta}_{-ik} \widehat{\beta}_{-k}^\top Z_k \widehat{\beta}_{-k} \mid V_k] = 0$ ,

$$\begin{aligned} \left| \mathbb{E}[\widehat{\beta}_{-ik}^\top Z_i \widehat{\beta}_{-ik} \widehat{\beta}_{-k}^\top Z_k \widehat{\beta}_{-k} \mid E_n \cap B_n] P(E_n \cap B_n \mid V_k) \right| &= \left| \mathbb{E}[\widehat{\beta}_{-ik}^\top Z_i \widehat{\beta}_{-ik} \widehat{\beta}_{-k}^\top Z_k \widehat{\beta}_{-k} \mathbf{1}\{(E_n \cap B_n)^C\} \mid V_k] \right| \\ &= \frac{\left| \mathbb{E}[\widehat{\beta}_{-ik}^\top Z_i \widehat{\beta}_{-ik} \widehat{\beta}_{-k}^\top Z_k \widehat{\beta}_{-k} \mathbf{1}\{(E_n \cap B_n)^C\} \mid V_k] \right|}{P(E_n \cap B_n \mid V_k)} \end{aligned}$$

199 Now, in the proof of Theorem 1, we showed that Lemma 2 and Lemma 1 imply that  $P(E_n \cap B_n) \rightarrow 1$ ,  
 200 and because  $V_k \supset (E_n \cap B_n)$ , this implies that  $P(E_n \cap B_n \mid V_k) \rightarrow 1$ , as well. What remains is to  
 201 control the numerator of the previous display.

202 Applying the Cauchy-Schwarz inequality gives

$$\left| \mathbb{E}[\widehat{\beta}_{-ik}^\top Z_i \widehat{\beta}_{-ik} \widehat{\beta}_{-k}^\top Z_k \widehat{\beta}_{-k} \mathbf{1}\{(E_n \cap B_n)^C\} \mid V_k] \right| \leq \sqrt{\mathbb{E} \left[ \left( \widehat{\beta}_{-ik}^\top Z_i \widehat{\beta}_{-ik} \widehat{\beta}_{-k}^\top Z_k \widehat{\beta}_{-k} \right)^2 \mid V_k \right] P((E_n \cap B_n)^C \mid V_k)}.$$

203 A very loose bound on the first term, using that  $\|X_i\|_2^2 \lesssim p$  with high probability,  $\widehat{\beta}_{-ik} \leq C$  on  $V_k$ ,  
 204 and similar expressions hold for the terms involving  $\widehat{\beta}_{-k}$  and  $X_k$  gives

$$\mathbb{E} \left[ \left( \widehat{\beta}_{-ik}^\top Z_i \widehat{\beta}_{-ik} \widehat{\beta}_{-k}^\top Z_k \widehat{\beta}_{-k} \right)^2 \mid V_k \right] \lesssim p^4.$$

205 Because  $V_k \supset (E_n \cap B_n)$ , we know that  $P((E_n \cap B_n)^C \mid V_k) \leq P((E_n \cap B_n)^C) \lesssim$   
 206  $n^2 \exp(-c_2 H_n^2) + n \exp(-c_3 K_n^2) + n \exp(-C_4 n(1 + o(1))) + \exp(-\Sigma(n))$ . Altogether, we have

$$\begin{aligned} n \left| \mathbb{E}[\widehat{\beta}_{-ik}^\top Z_i \widehat{\beta}_{-ik} \widehat{\beta}_{-k}^\top Z_k \widehat{\beta}_{-k} \mathbf{1}\{(E_n \cap B_n)^C\} \mid V_k] \right| \\ \lesssim \sqrt{n^2 p^4 (n^2 \exp(-c_2 H_n^2) + n \exp(-c_3 K_n^2) + n \exp(-C_4 n(1 + o(1))) + \exp(-\Sigma(n)))}. \end{aligned}$$

207 Using the conditions on  $K_n$  and  $H_n$  from (B.1), we know that this bound goes to 0, completing the  
 208 proof.  $\square$

209

## 210 D Genomics

211 Variants known to be associated with glaucoma, in the form “(chromosome)-(position)-(allele1)-  
 212 (allele2)” using coordinates from the GRCh37 human genome build. 127 in total.

|                  |                  |                  |                  |                  |
|------------------|------------------|------------------|------------------|------------------|
| 1-8495590-A-G    | 1-36612955-C-A   | 1-38076621-C-T   | 1-54123873-G-T   | 1-68837169-A-C   |
| 1-88213014-T-C   | 1-92077097-G-A   | 1-101095202-A-G  | 1-103379918-G-A  | 1-113242122-T-G  |
| 1-162679145-G-A  | 1-165737704-C-G  | 1-171605478-G-A  | 1-219215137-G-A  | 2-12951321-C-T   |
| 2-28365914-G-A   | 2-45878760-G-T   | 2-55933014-C-T   | 2-59523041-T-C   | 2-66537344-G-T   |
| 2-69411517-A-C   | 2-71651939-T-A   | 2-111638775-C-T  | 2-153364527-A-G  | 2-213760746-AT-A |
| 3-24510794-A-C   | 3-25581798-C-T   | 3-56876596-T-C   | 3-85172364-G-C   | 3-105073472-A-C  |
| 3-150065280-C-T  | 3-169239578-A-G  | 3-171821356-A-G  | 3-186128816-A-G  | 3-188066953-T-G  |
| 4-7904363-G-A    | 4-54027595-A-G   | 4-89752276-G-A   | 4-111963719-C-T  | 4-184779187-G-T  |
| 5-14814883-A-G   | 5-55783678-G-A   | 6-1548369-A-G    | 6-29806901-C-G   | 6-36570366-T-C   |
| 6-45919758-G-A   | 6-51414922-C-T   | 6-122645298-A-C  | 6-134372150-C-G  | 6-136462744-T-G  |
| 6-158971266-A-G  | 6-170454915-A-G  | 7-11679113-A-G   | 7-28401455-C-G   | 7-35961137-C-T   |
| 7-39077397-C-T   | 7-80845529-G-GA  | 7-82949529-T-G   | 7-103624813-A-G  | 7-116162306-A-T  |
| 7-117636111-C-G  | 7-134520521-C-A  | 7-151505698-C-T  | 8-6377141-C-G    | 8-30454209-CA-C  |
| 8-108273318-T-G  | 8-124554317-A-T  | 9-22051670-G-C   | 9-107695539-T-C  | 9-113312231-G-C  |
| 9-129390800-C-T  | 9-136131188-C-T  | 10-10840849-A-C  | 10-60326910-G-A  | 10-78282063-T-C  |
| 10-94929116-C-T  | 10-96023077-T-C  | 10-115546535-A-G | 10-126278648-T-C | 11-17011176-C-A  |
| 11-47469439-A-G  | 11-65337251-A-T  | 11-86368106-T-C  | 11-102064834-C-A | 11-115039683-G-A |
| 11-120198093-G-A | 11-128380742-C-A | 11-130282078-T-C | 12-28203245-T-A  | 12-83948055-T-C  |
| 12-107219308-A-G | 12-111932800-C-T | 13-22673870-A-G  | 13-73639371-G-A  | 13-76258720-A-G  |
| 13-110777939-C-G | 14-53960089-A-G  | 14-60976537-C-A  | 14-75084829-G-A  | 14-76371658-G-C  |
| 14-95956875-T-C  | 15-57553832-A-T  | 15-61947280-C-G  | 15-67025403-C-T  | 15-74221298-C-T  |
| 15-92331707-A-G  | 16-51601948-C-T  | 16-59995564-A-G  | 16-65067443-C-T  | 16-77661732-C-T  |
| 17-2201944-A-G   | 17-10031183-A-G  | 17-44025888-C-A  | 17-45695242-AT-A | 17-59239221-A-G  |
| 20-6470094-G-A   | 20-38074218-T-C  | 20-45534053-A-G  | 21-27216839-T-A  | 21-40406630-G-A  |
| 22-19870147-C-T  | 22-29108229-A-G  | 22-38176979-T-G  | X-3329593-C-T    | X-13954397-C-T   |
| X-43940827-T-C   | X-109786110-C-A  |                  |                  |                  |

213

## 214 E German Credit Data

215 To provide an example applying SLOE to real data analysis, we consider the German Credit Data  
216 from the UCI Machine Learning Repository [Dua and Graff, 2017]. The outcome is whether the  
217 customer has good or bad credit, and the features represent a variety of qualitative and quantitative  
218 features with  $n = 1000$  observations. The qualitative features were converted to numeric features  
219 using one-hot encoding. Therefore, while the original data only have 20 features, the model has 48  
220 features. Then, we normalized the features to have mean zero and unit variance, so that the confidence  
221 intervals of the features would be on the same scale.

222 The regression coefficients from this model represent the association between each feature and the  
223 customer’s credit, however they may not be causal, as no explicit consideration has been made for  
224 confounding factors. In this sense, the effect size represents the effect of the feature along with the  
225 effect of confounding variables associated with that feature.

226 We split the data in half, and used half to train a logistic regression model, using both the MLE and  
227 the MLE corrected with SLOE. The estimated corrupted signal strength was  $\hat{\eta}^2 = 3.596$ , and when  
228 the equations are solved, the estimated standard error was  $\kappa\hat{\sigma}^2 = 0.979$  and the bias inflation factor  
229 was  $\hat{\alpha} = 1.150$ . This suggests that the signal strength was quite small,  $\gamma^2 \approx (\hat{\eta}^2 - \kappa\hat{\sigma}^2)/\hat{\alpha} = 2.27$ ,  
230 as was the aspect ratio,  $\kappa = 0.096$ , suggesting that the effect of the high dimensionality correction  
231 will be small. Figure 4 shows the confidence intervals. As expected, the confidence intervals from  
232 the MLE and from correction with SLOE are fairly similar. This suggests that using the correction  
233 from SLOE, even when not in particularly high dimensions, does not come at a cost. However, one  
234 can observe that many of the confidence intervals for the MLE exclude 0, suggesting a statistically  
235 significant association, while the confidence intervals with SLOE include zero, suggesting that the  
236 association might be spurious.

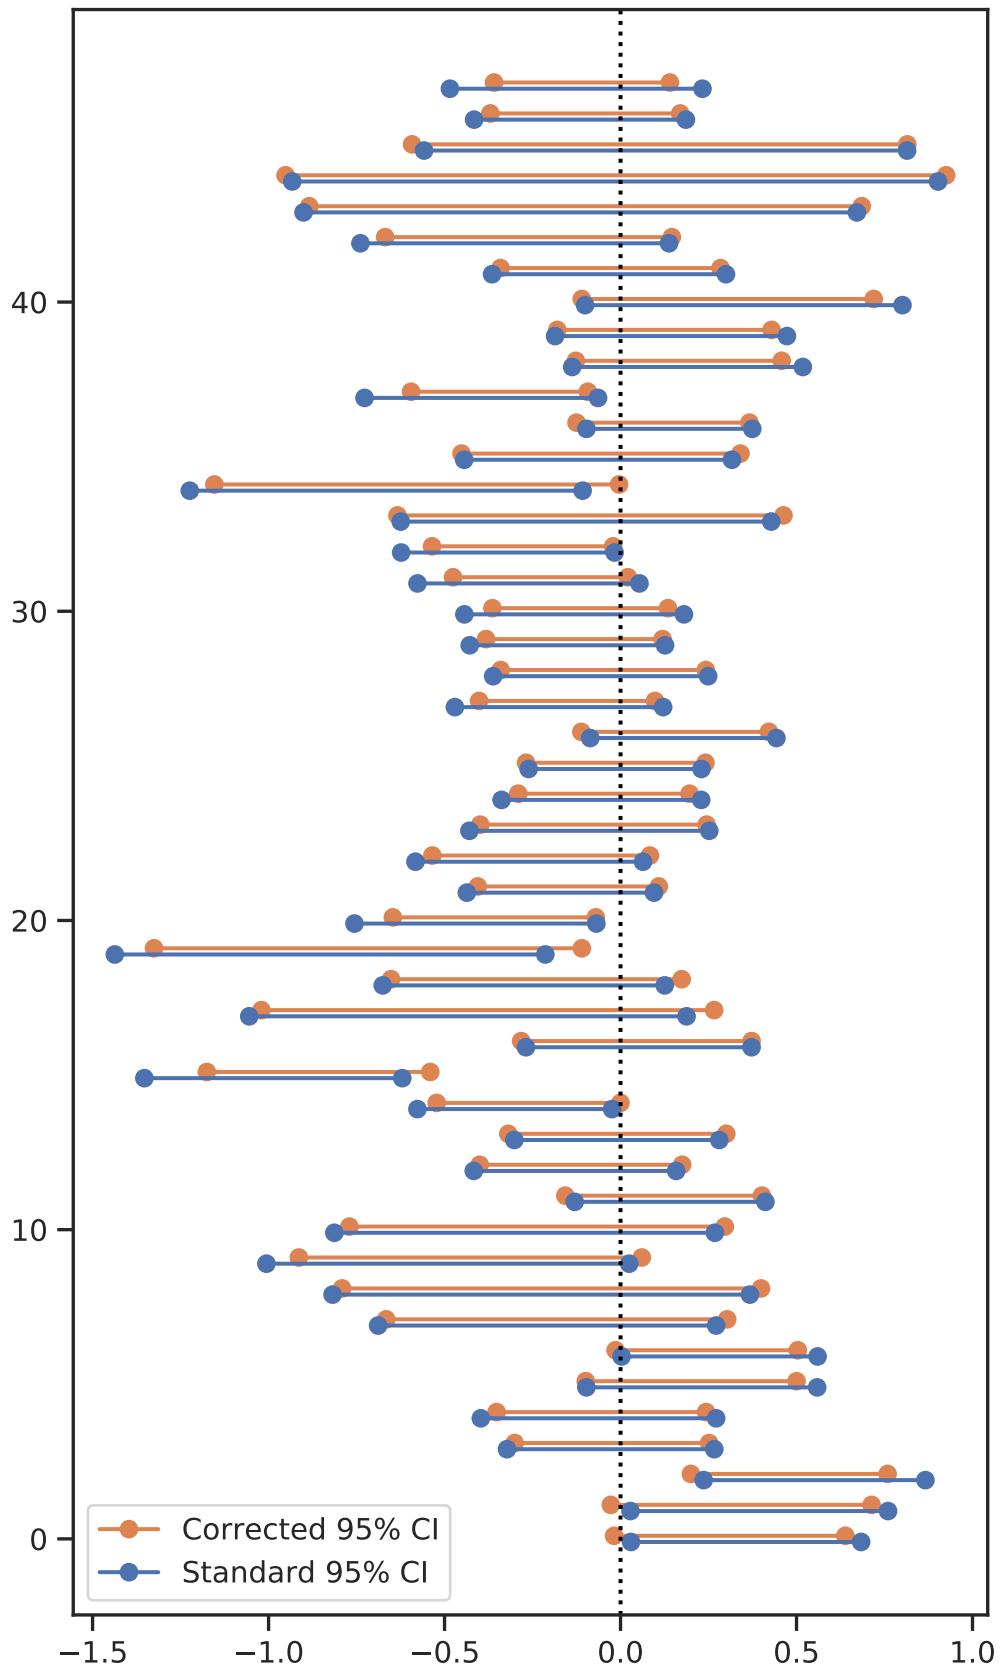

**Figure 4.** Confidence intervals for coefficients from the German Credit Data from the UCI Machine Learning Repository.

237 **References**

- 238 D. Dua and C. Graff. UCI machine learning repository, 2017. URL [http://archive.ics.uci.](http://archive.ics.uci.edu/ml)  
239 [edu/ml](http://archive.ics.uci.edu/ml).
- 240 B. Efron and R. J. Tibshirani. *An Introduction to the Bootstrap*. Chapman & Hall, 1993.
- 241 N. El Karoui. On the impact of predictor geometry on the performance on high-dimensional ridge-  
242 regularized generalized robust regression estimators. *Probability Theory and Related Fields*, 170  
243 (1):95–175, 2018.
- 244 J. Praestgaard. Bootstrap with general weights and multiplier central limit theorems. *Technical Rep*,  
245 195, 1990.
- 246 P. Sur and E. J. Candès. A modern maximum-likelihood theory for high-dimensional logistic  
247 regression. *Proceedings of the National Academy of Sciences*, 116(29):14516–14525, 2019.
- 248 P. Sur, Y. Chen, and E. J. Candès. The likelihood ratio test in high-dimensional logistic regression  
249 is asymptotically a rescaled chi-square. *Probability theory and related fields*, 175(1-2):487–558,  
250 2019.
- 251 Q. Zhao, P. Sur, and E. J. Candès. The asymptotic distribution of the mle in high-dimensional logistic  
252 models: Arbitrary covariance. *arXiv preprint arXiv:2001.09351*, 2020.
